# Supplementary material
Source: MDPI journal article supplement (https://www.mdpi.com/2073-4441/15/16/2919)
Supplement: s1 [file s1]

## Supplementary Material

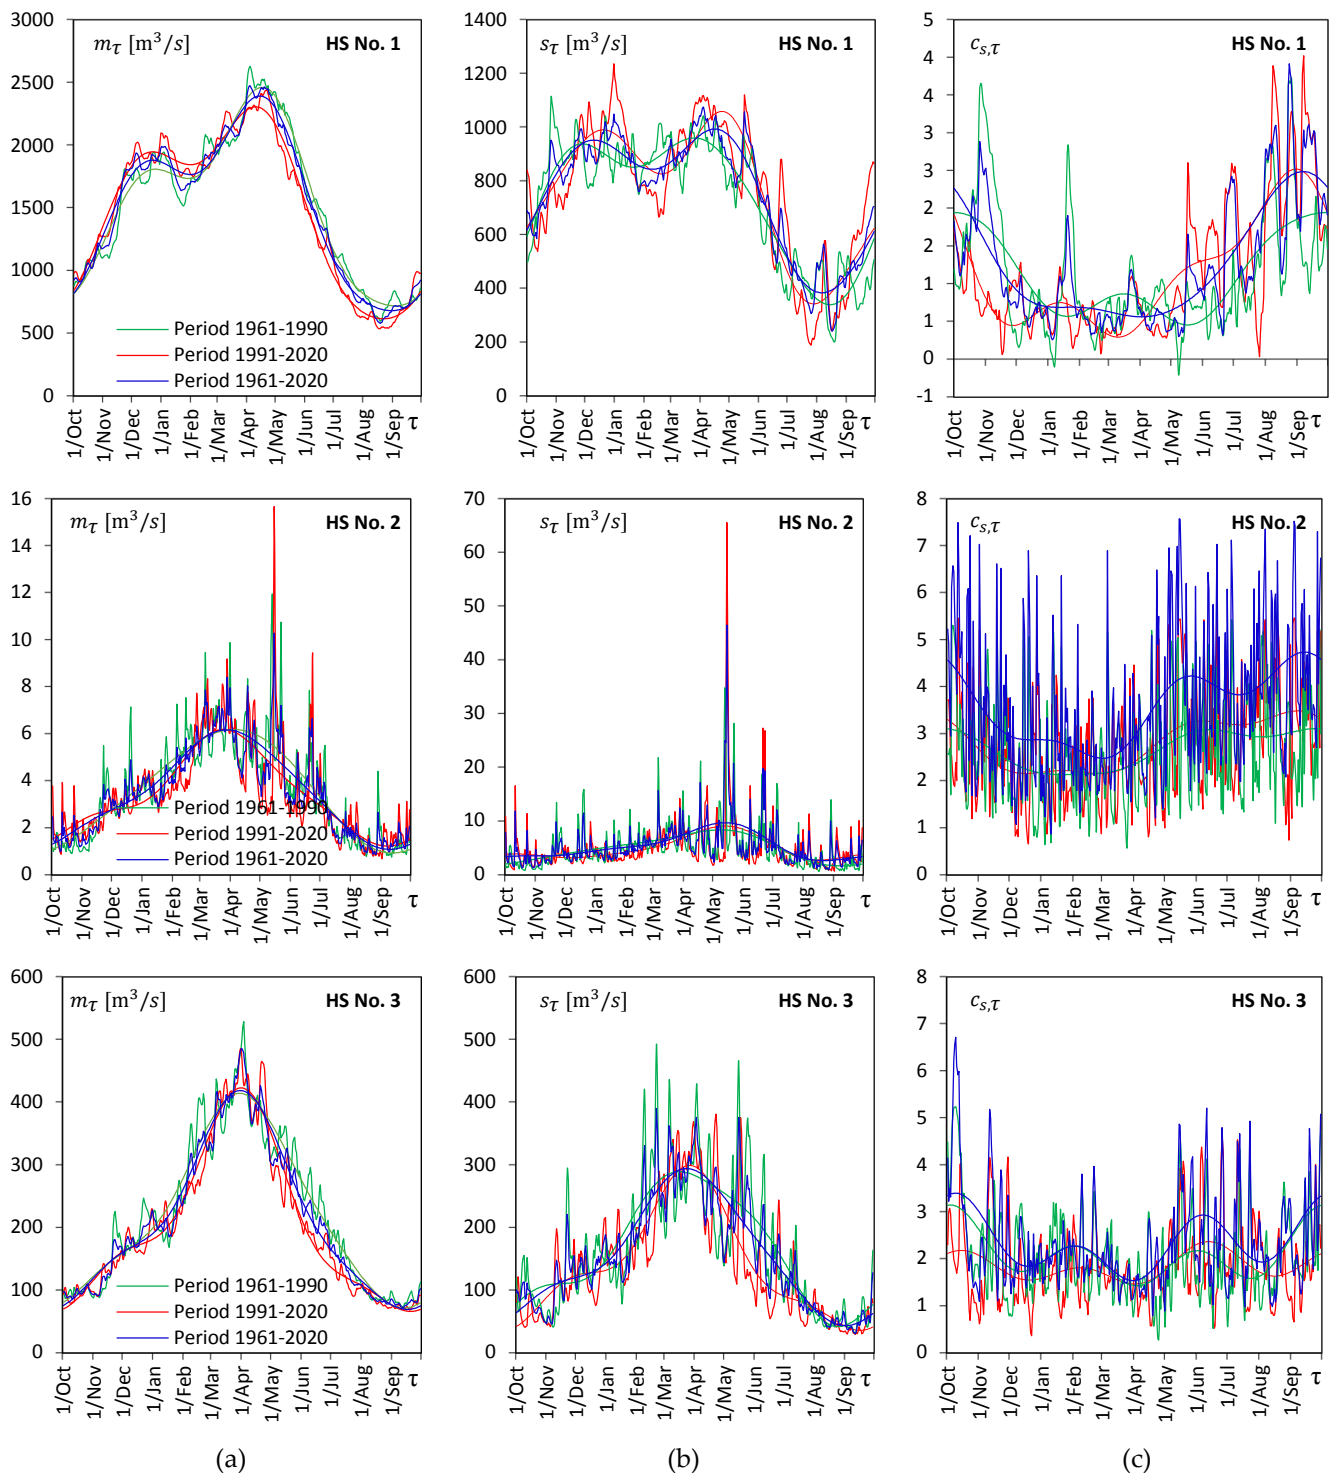

**Figure S1.** Seasonal variation of daily flow statistics (peaky lines) and their corresponding periodic functions (smooth lines) at all HS estimated for the three periods: (a) mean, (b) standard deviation, and (c) coefficient of skewness.

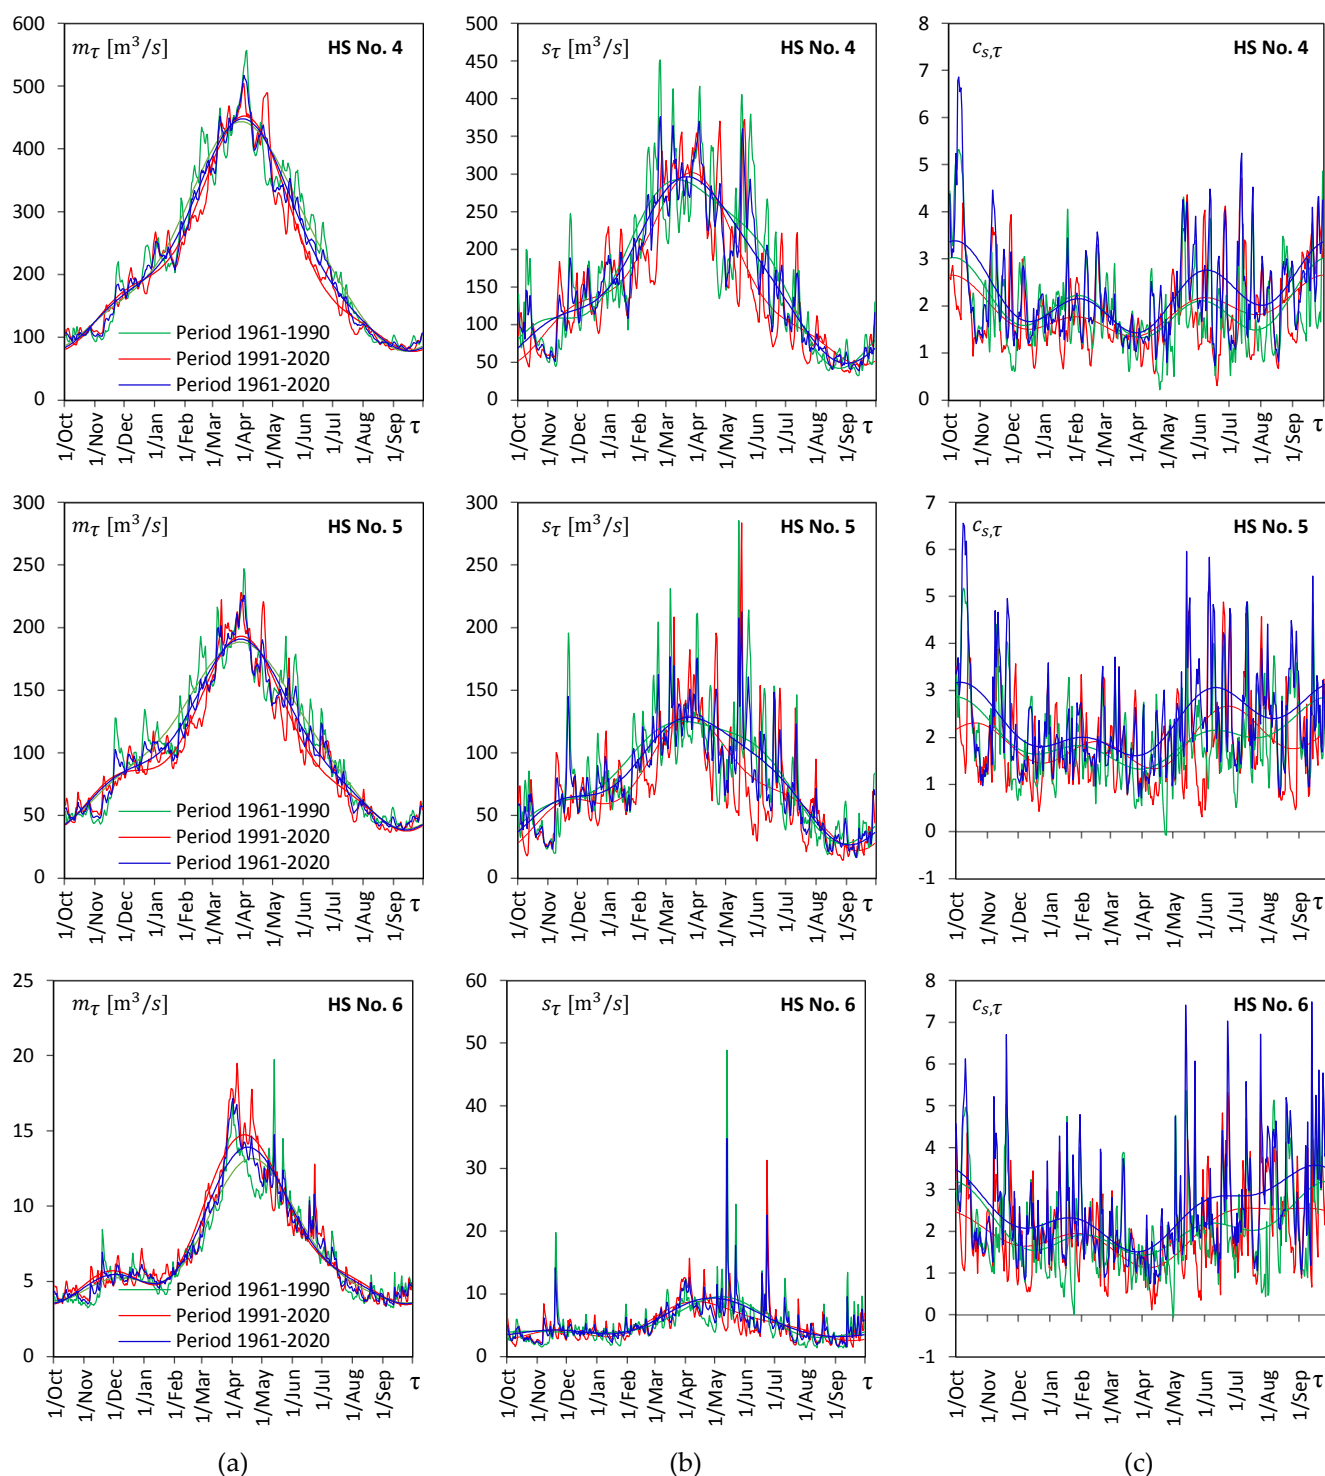

**Figure S1-cont'd.** Seasonal variation of daily flow statistics (peaky lines) and their corresponding periodic functions (smooth lines) at all HS estimated for the three periods: (a) mean, (b) standard deviation, and (c) coefficient of skewness.

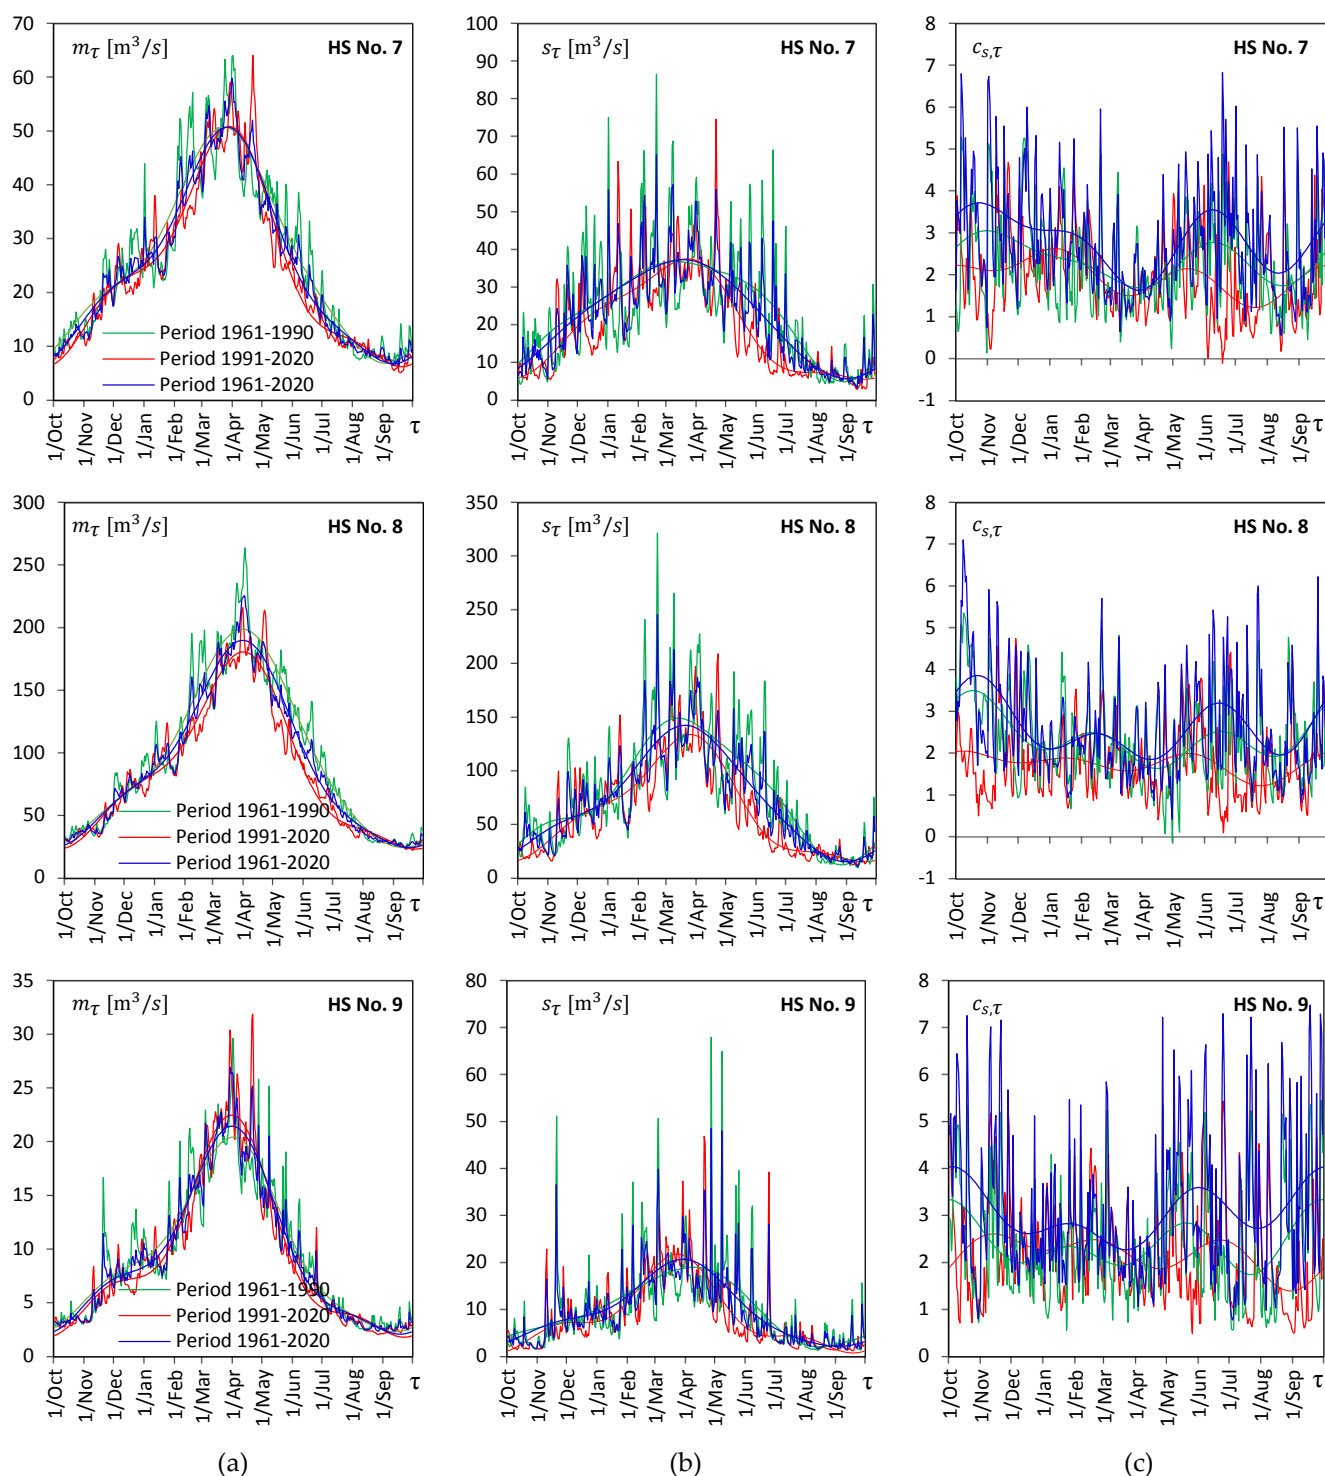

**Figure S1-cont'd.** Seasonal variation of daily flow statistics (peaky lines) and their corresponding periodic functions (smooth lines) at all HS estimated for the three periods: (a) mean, (b) standard deviation, and (c) coefficient of skewness.

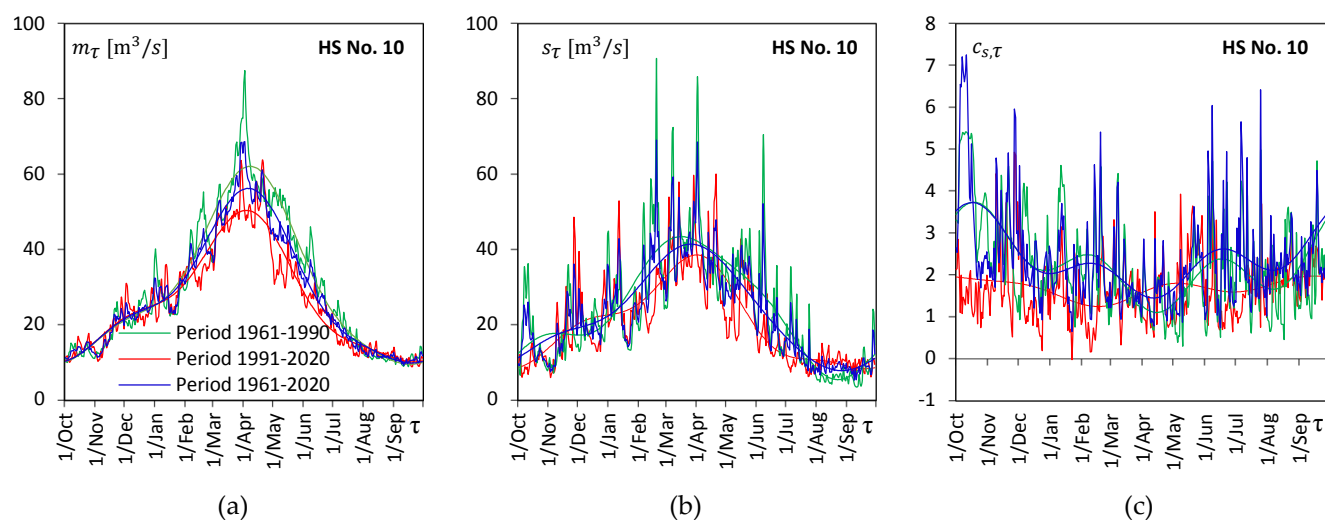

**Figure S1-cont'd.** Seasonal variation of daily flow statistics (peaky lines) and their corresponding periodic functions (smooth lines) at all HS estimated for the three periods: (a) mean, (b) standard deviation, and (c) coefficient of skewness.

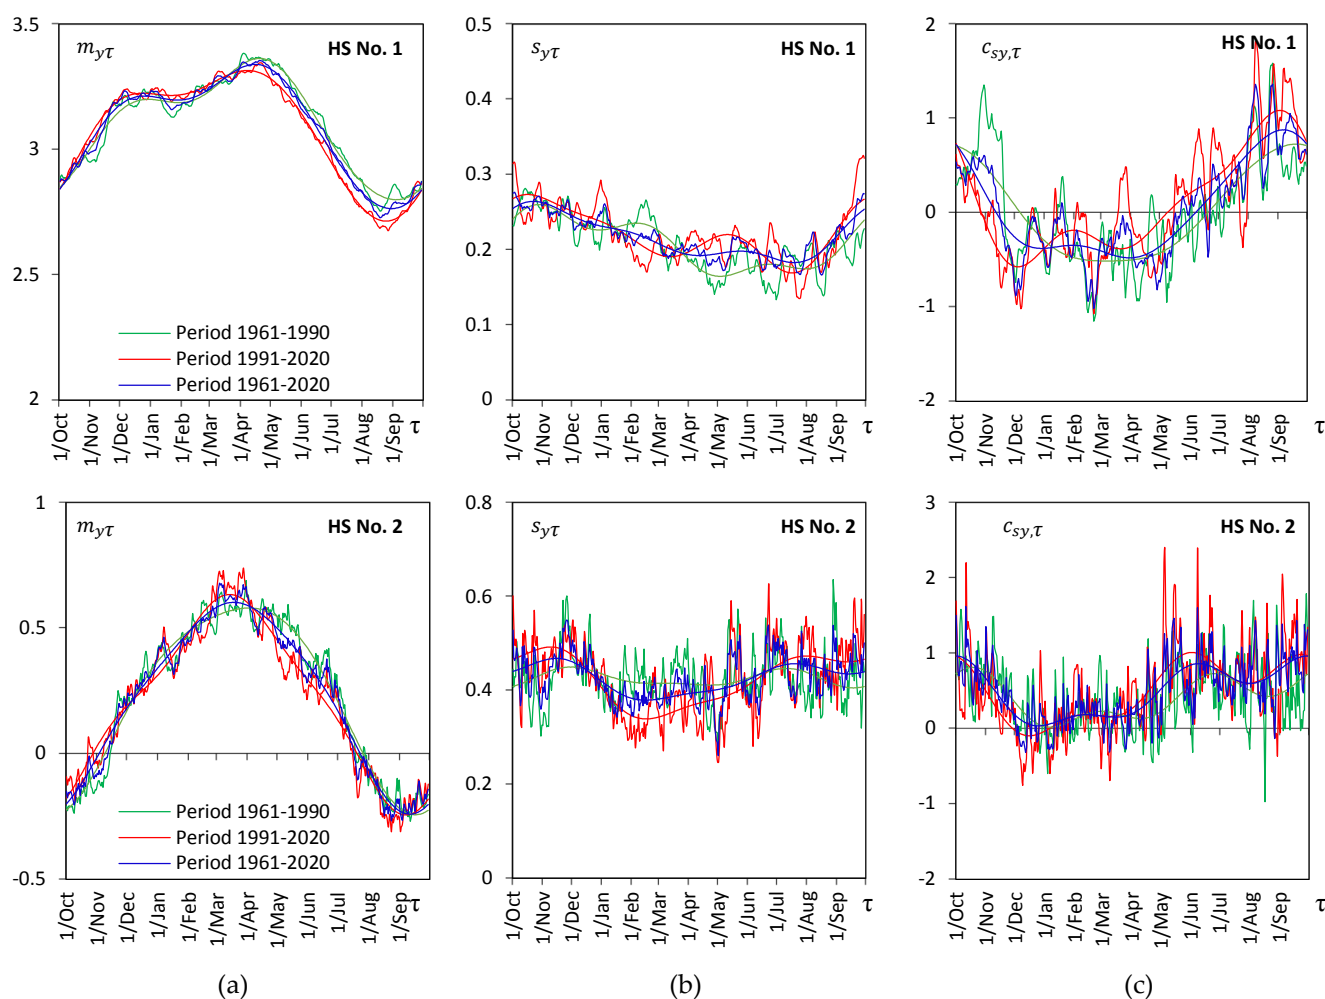

**Figure S2.** Seasonal variation of log-transformed daily flow statistics (peaky lines) and their corresponding periodic functions (smooth lines) at all HS estimated for the three periods: (a) mean, (b) standard deviation, and (c) coefficient of skewness.

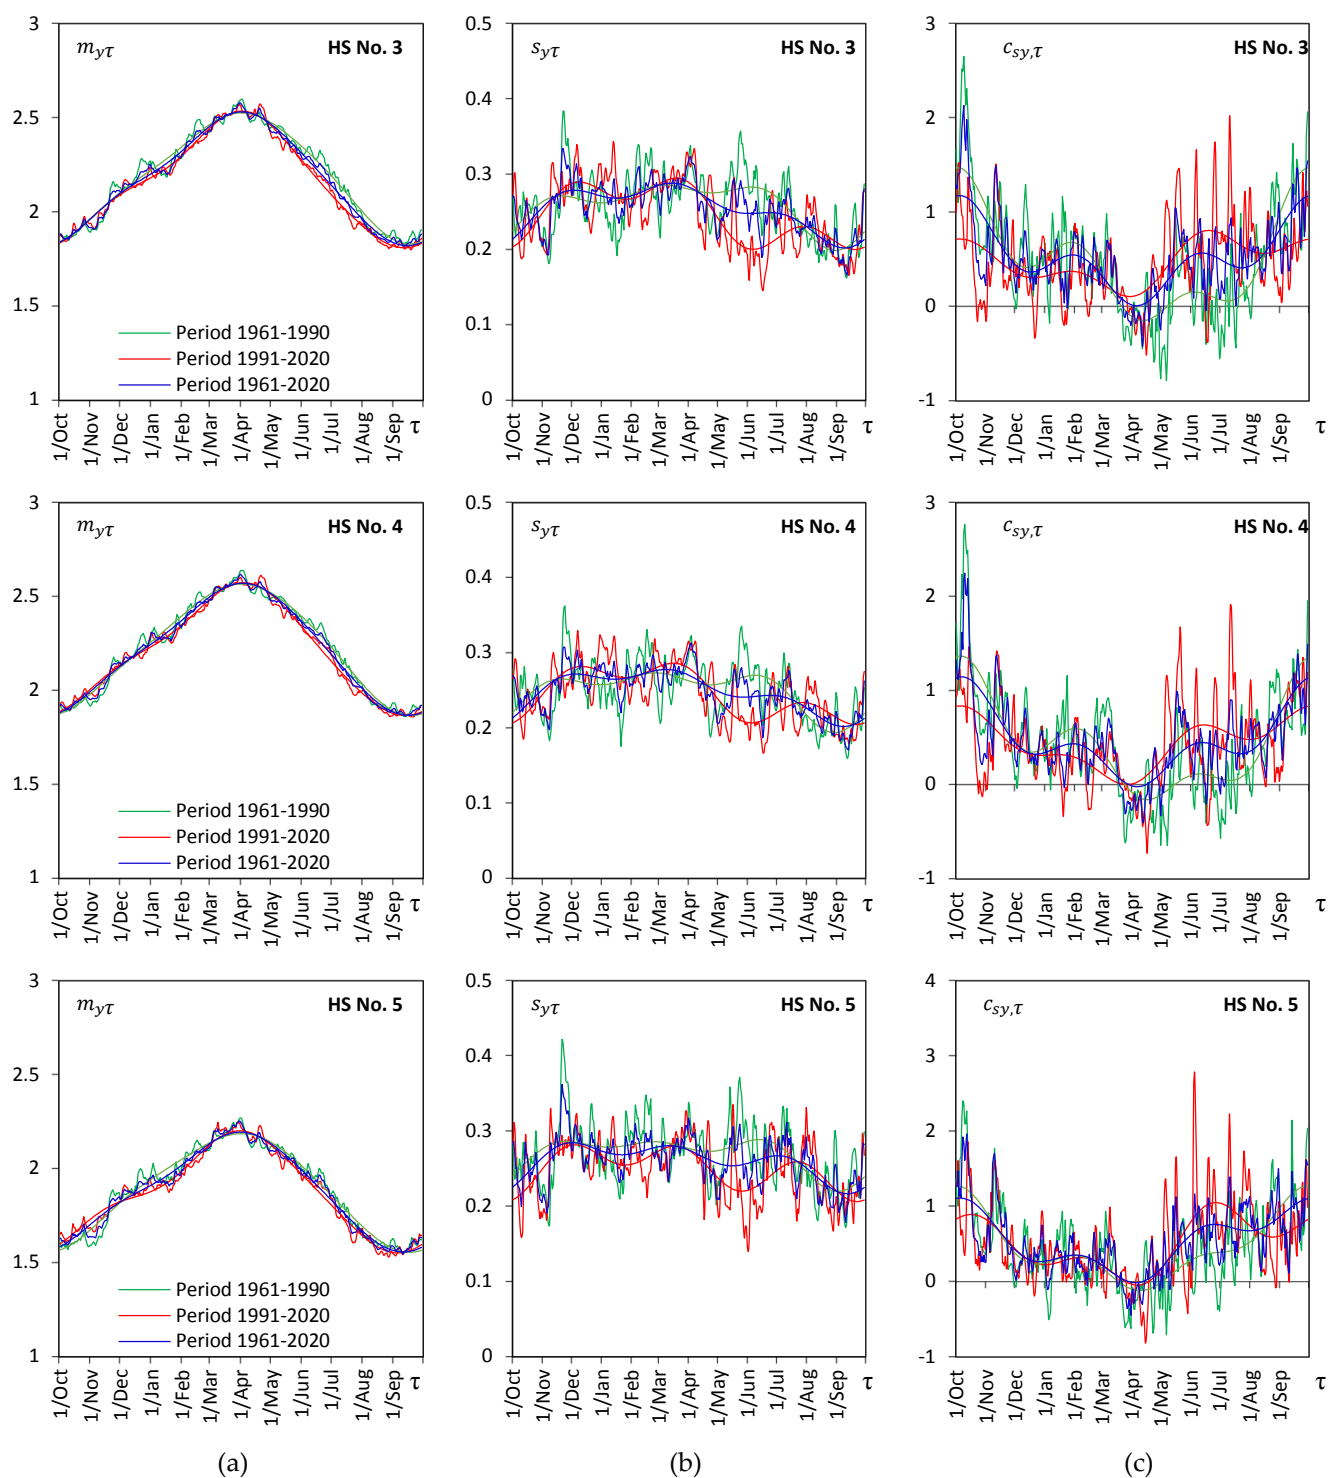

**Figure S2-cont'd.** Seasonal variation of log-transformed daily flow statistics (peaky lines) and their corresponding periodic functions (smooth lines) at all HS estimated for the three periods: (a) mean, (b) standard deviation, and (c) coefficient of skewness.

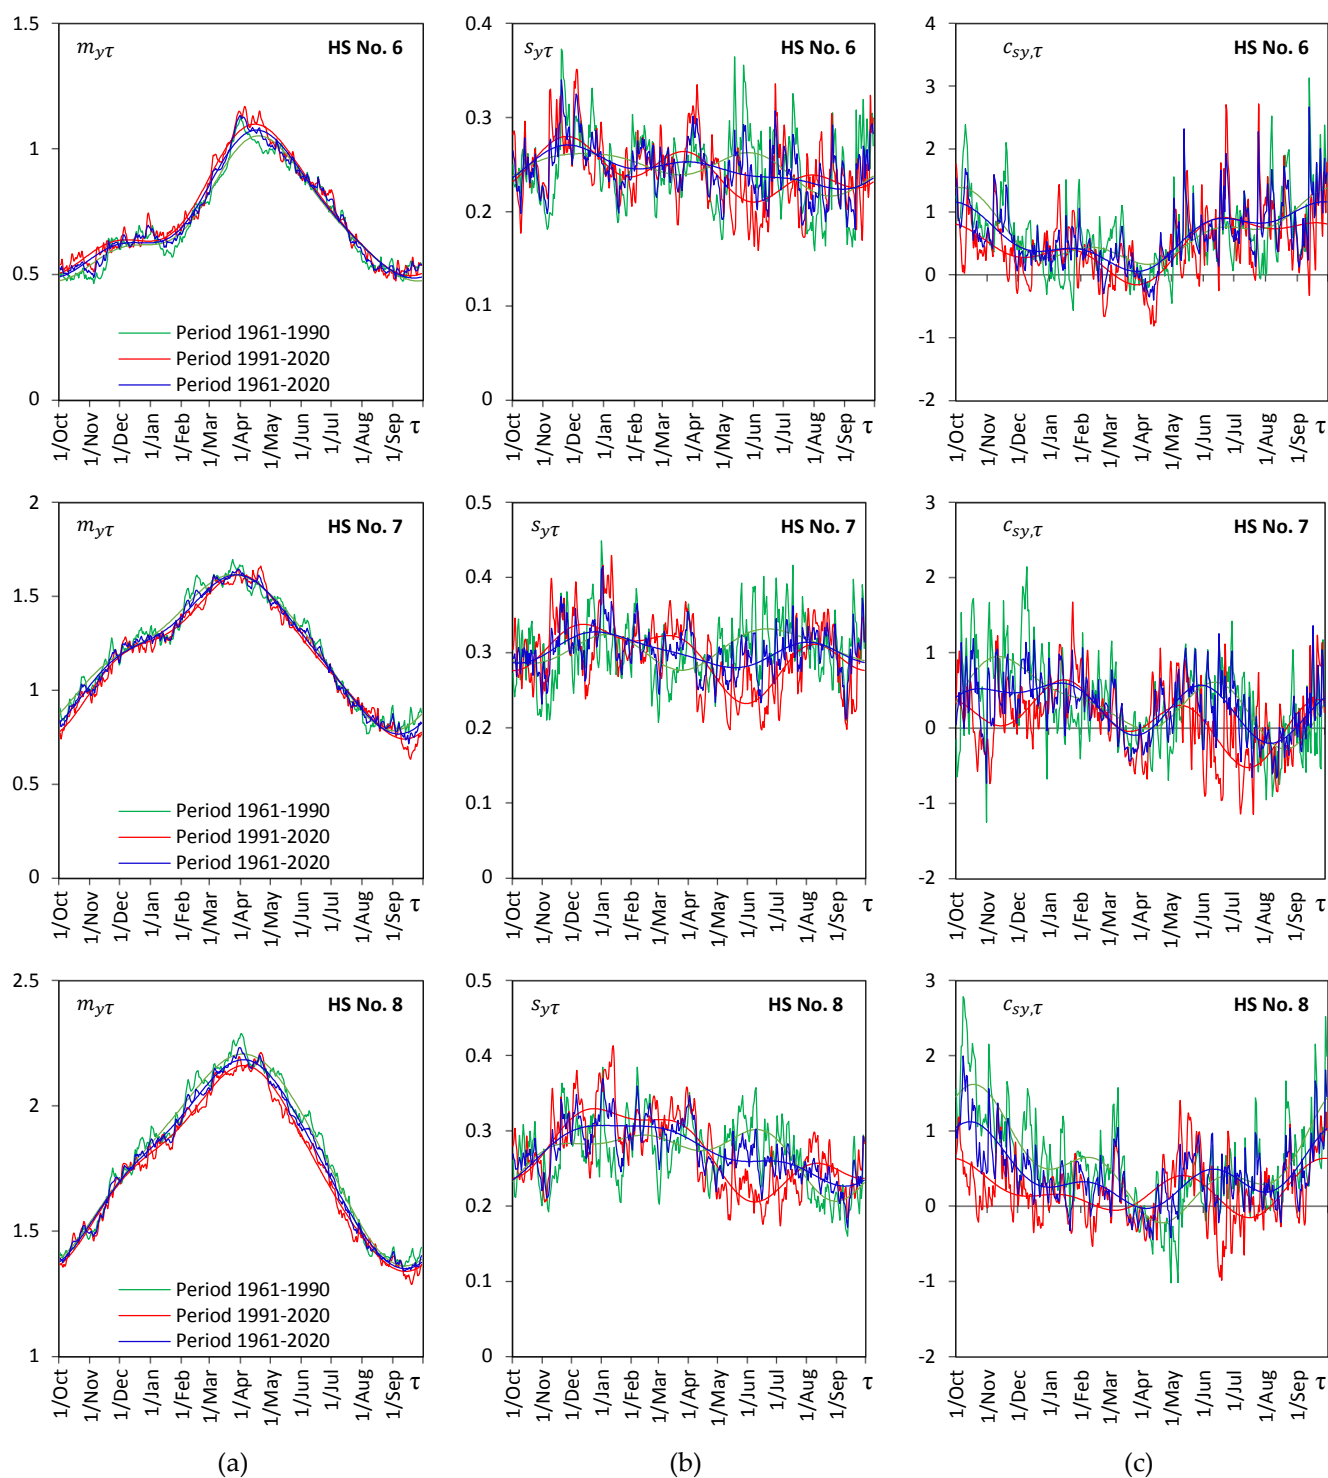

**Figure S2-cont'd.** Seasonal variation of log-transformed daily flow statistics (peaky lines) and their corresponding periodic functions (smooth lines) at all HS estimated for the three periods: (a) mean, (b) standard deviation, and (c) coefficient of skewness.



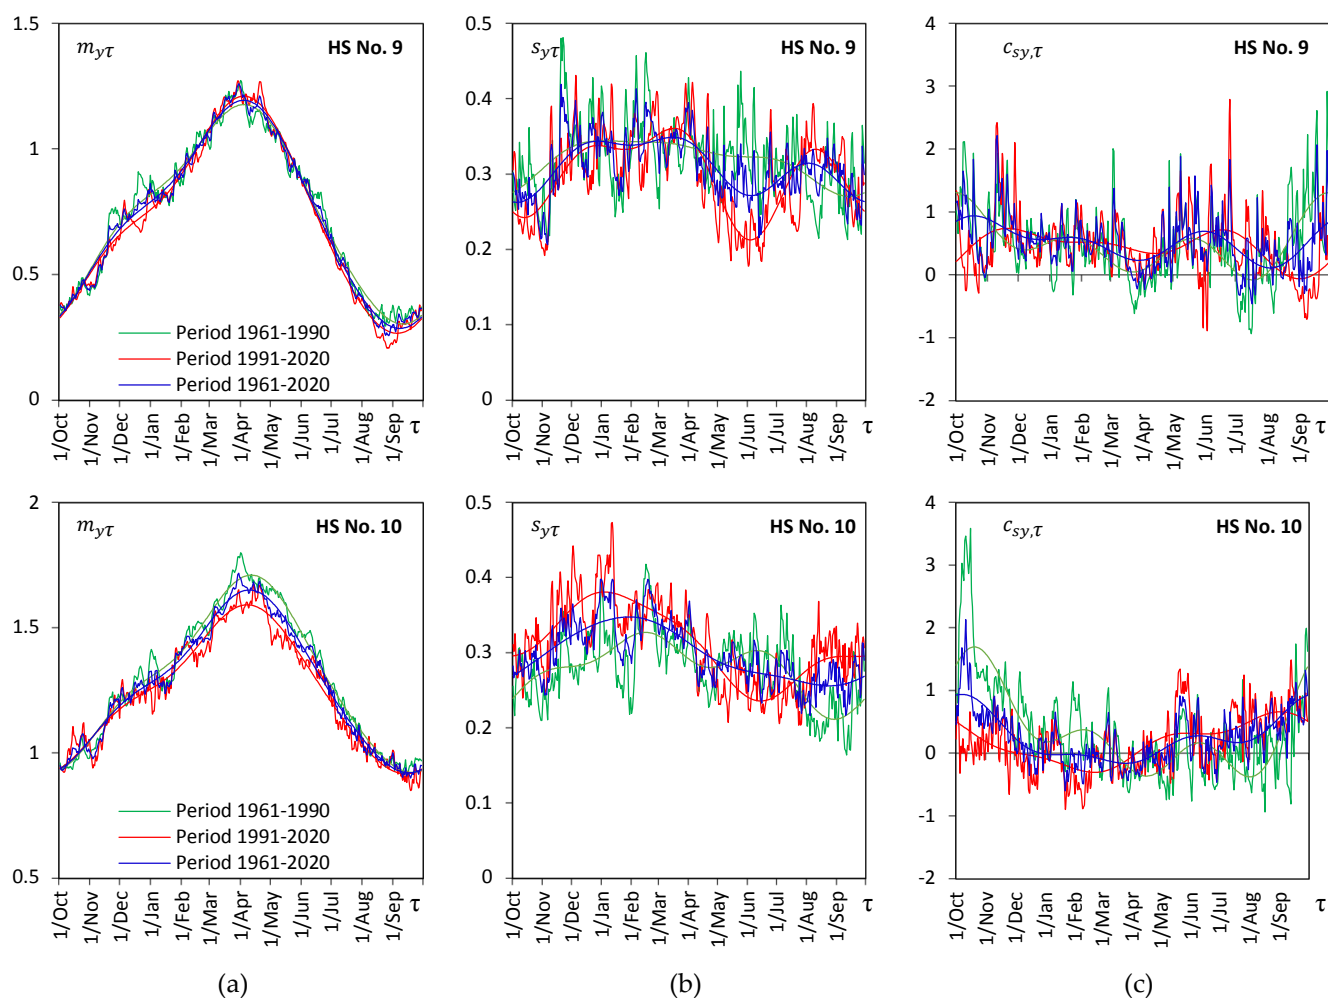

**Figure S2-cont'd.** Seasonal variation of log-transformed daily flow statistics (peaky lines) and their corresponding periodic functions (smooth lines) at all HS estimated for the three periods: (a) mean, (b) standard deviation, and (c) coefficient of skewness.

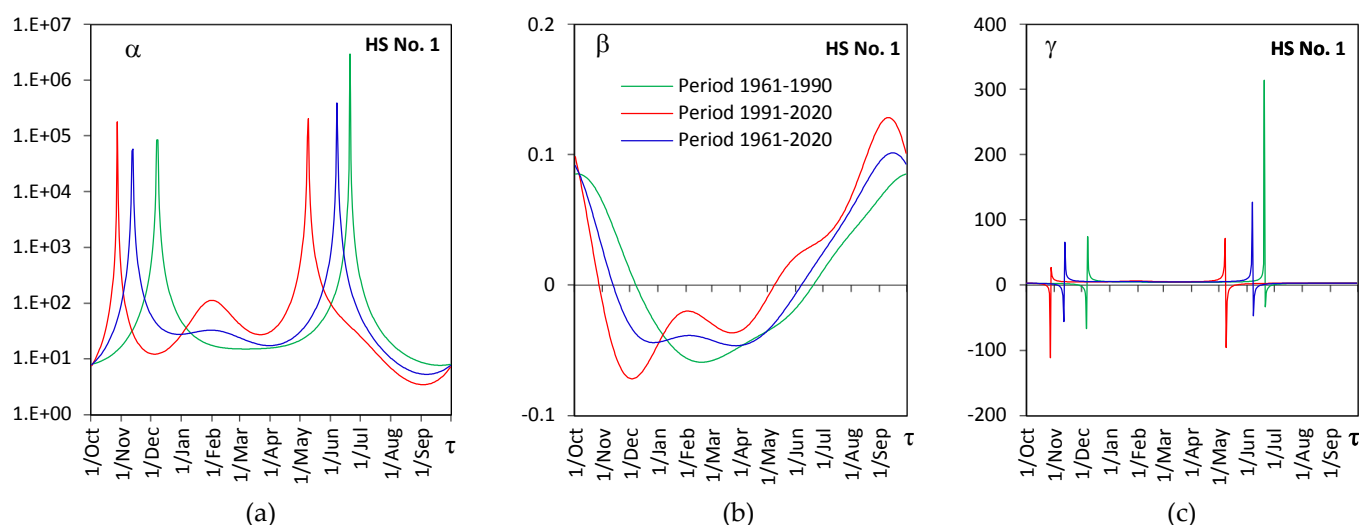

**Figure S3.** Periodical parameters of LPT3 marginal distribution of daily flows at all HS: (a) shape parameter  $\alpha_{\tau,per}$ , (b) scale parameter  $\beta_{\tau,per}$ , (c) location parameter  $\gamma_{\tau,per}$ .

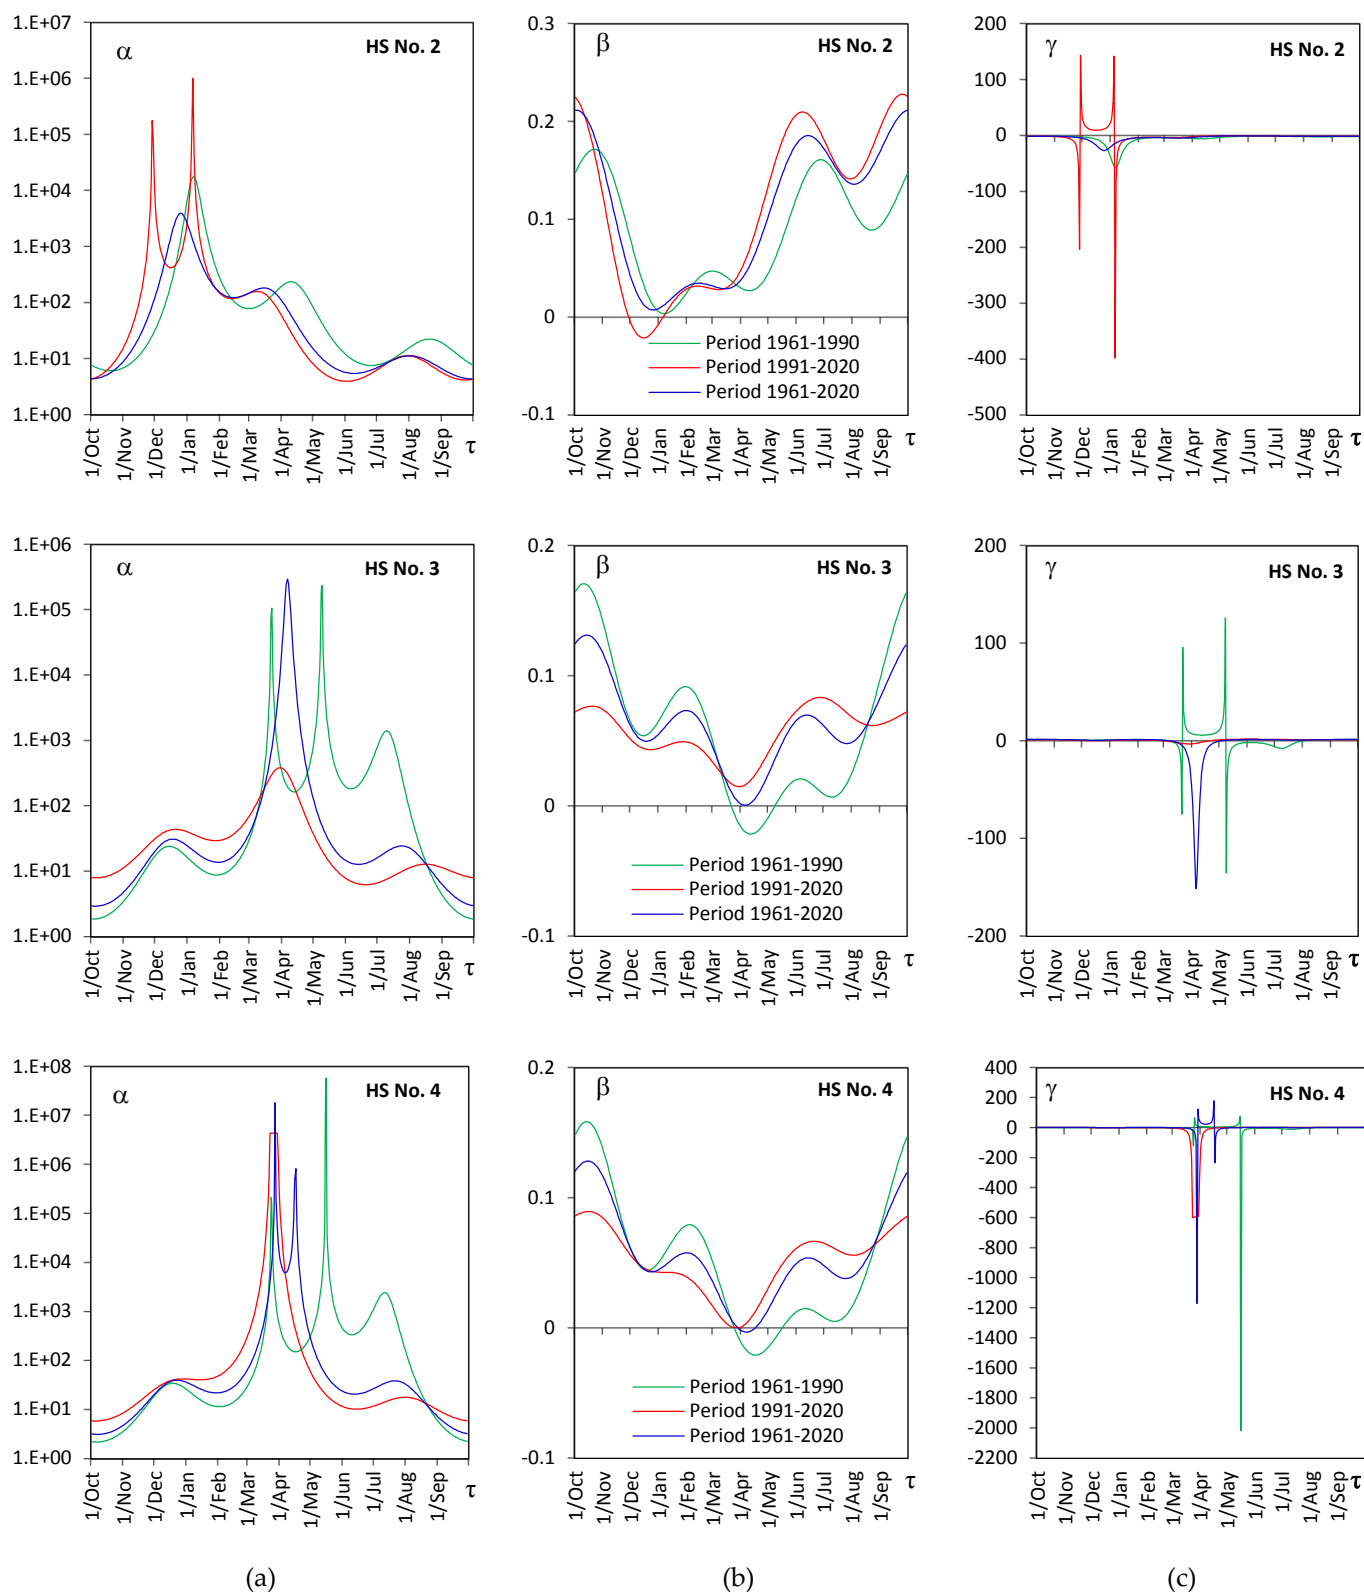

**Figure S3-cont'd.** Periodical parameters of LPT3 marginal distribution of daily flows at all HS: (a) shape parameter  $\alpha_{\tau,per}$ , (b) scale parameter  $\beta_{\tau,per}$ , (c) location parameter  $\gamma_{\tau,per}$ .



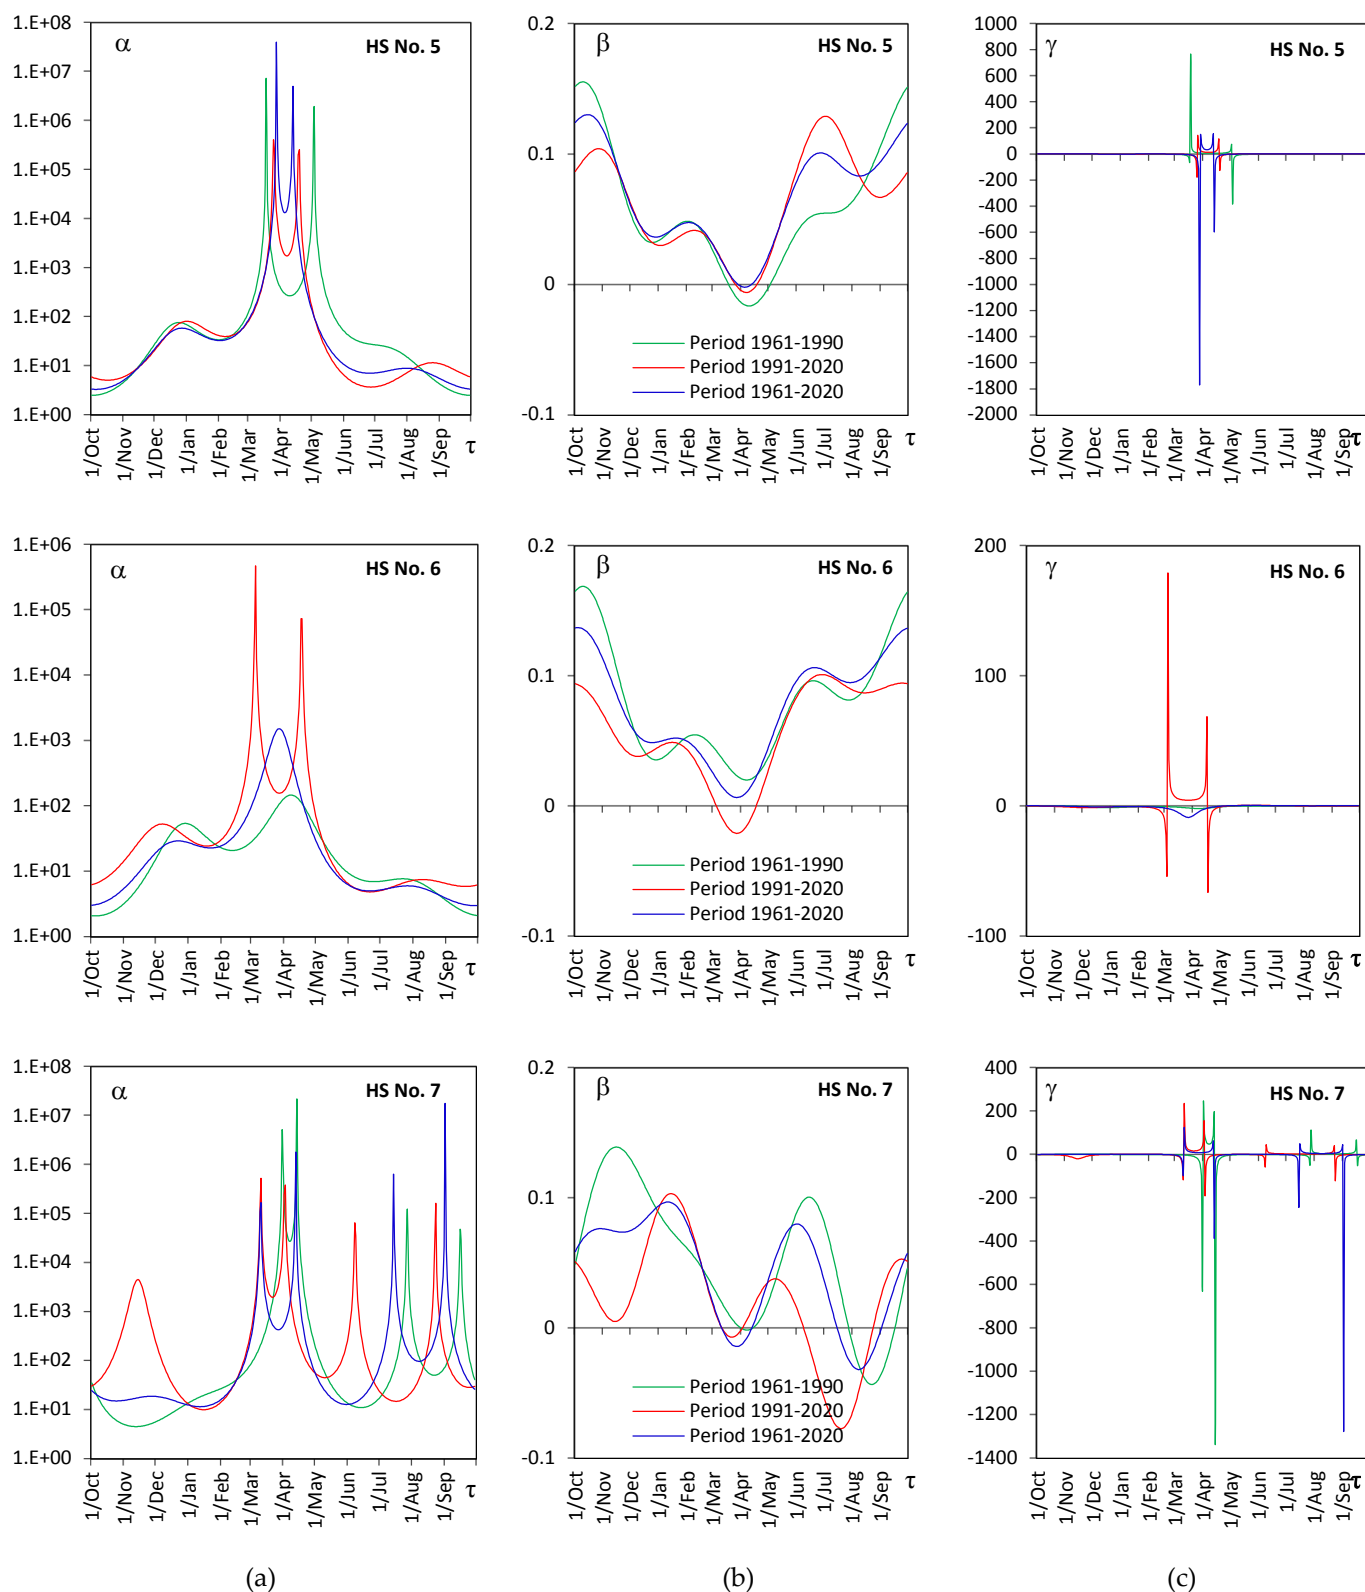

**Figure S3-cont'd.** Periodical parameters of LPT3 marginal distribution of daily flows at all HS: (a) shape parameter  $\alpha_{\tau,per}$ , (b) scale parameter  $\beta_{\tau,per}$ , (c) location parameter  $\gamma_{\tau,per}$ .

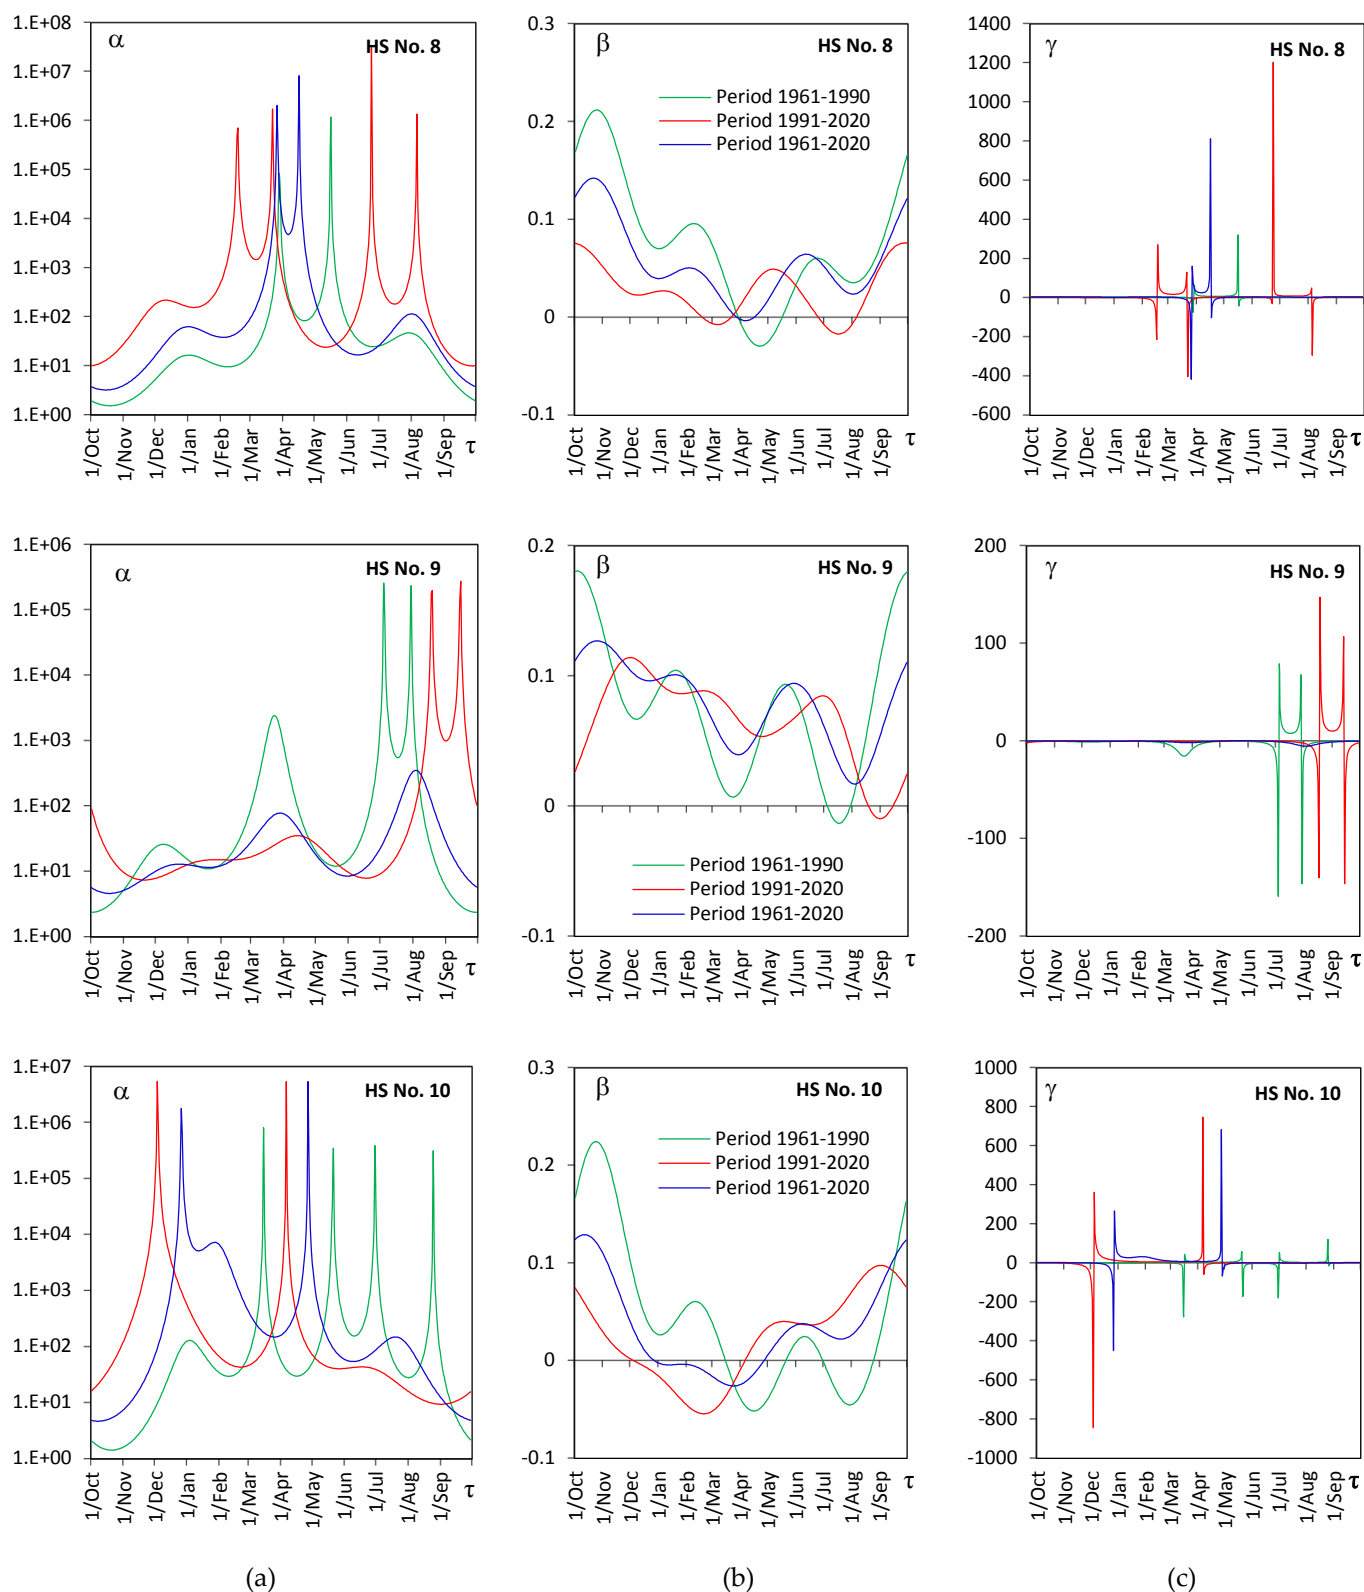

**Figure S3-cont'd.** Periodical parameters of LPT3 marginal distribution of daily flows at all HS: (a) shape parameter  $\alpha$ , (b) scale parameter  $\beta$ , (c) location parameter  $\gamma$ .

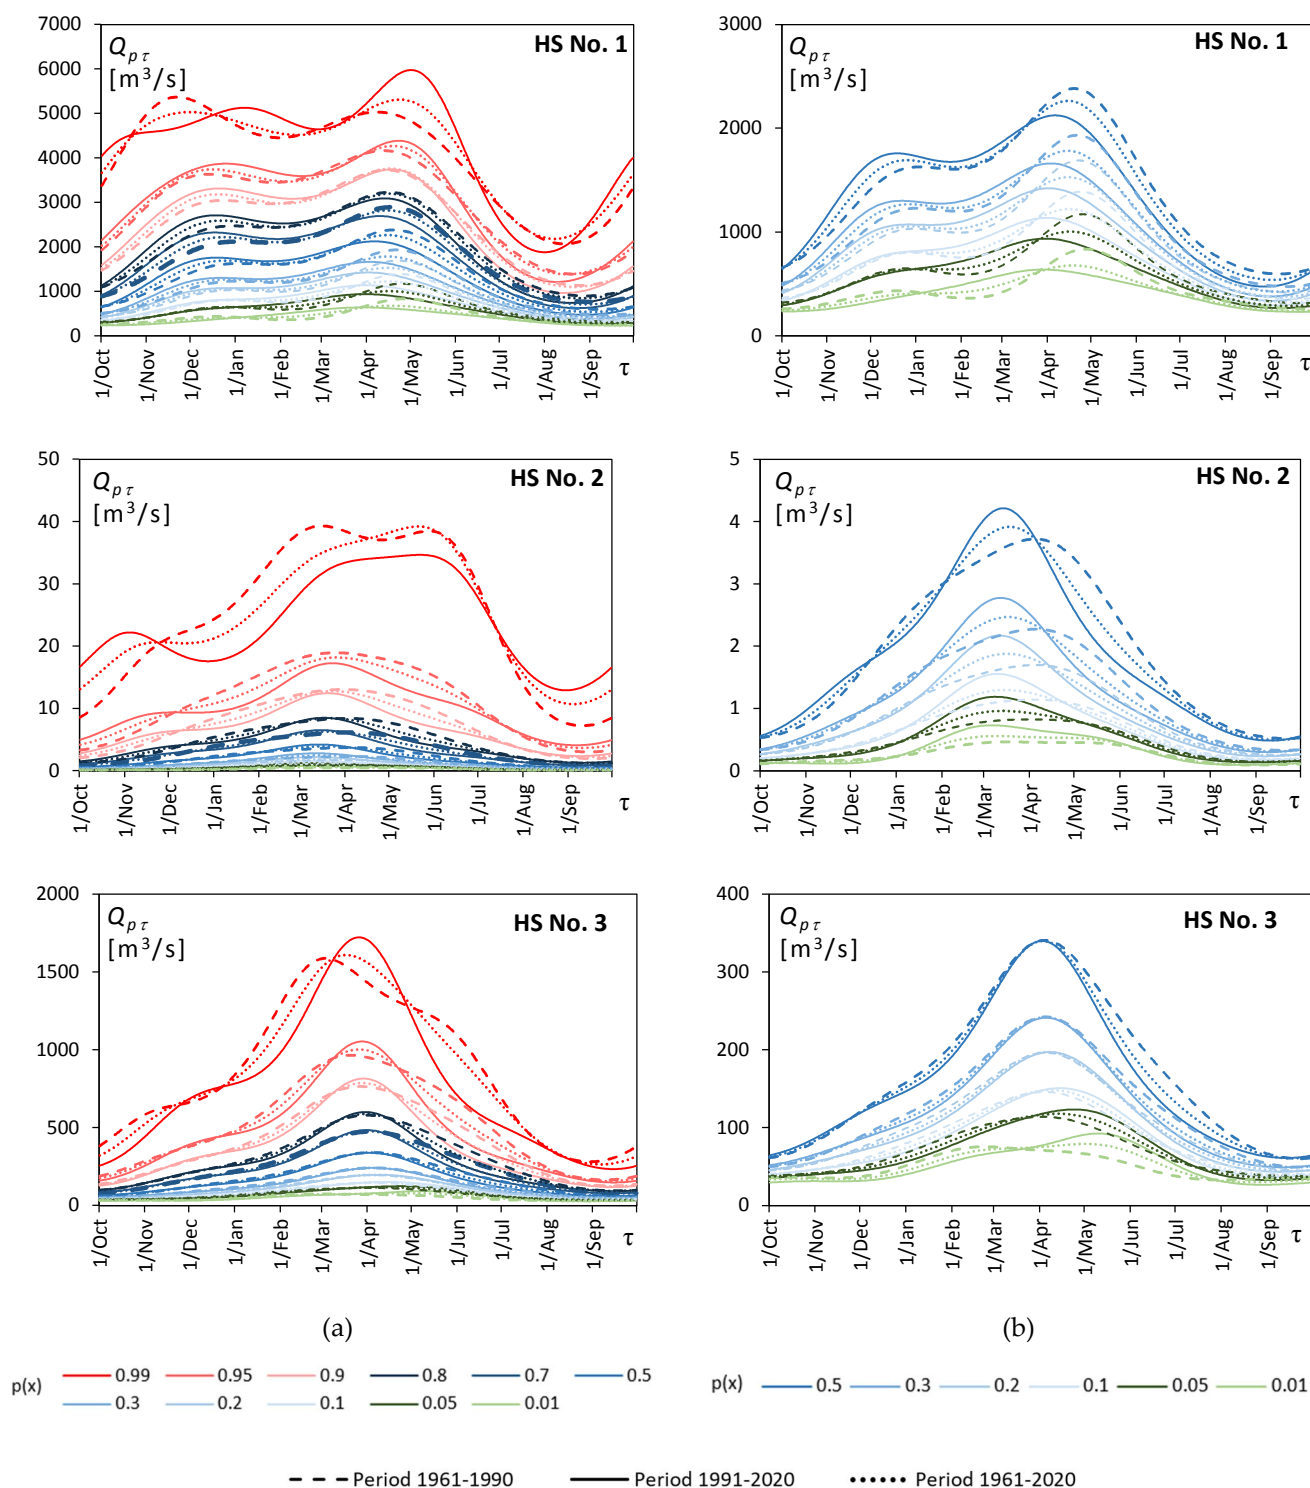

**Figure S4.** The diagrams of MDDF at all HS for the three periods showing the quantiles (a) for a full range of probabilities  $p(x)$ , from 0.01 to 0.99, and (b) for low to median probabilities. Solid lines represent the latest 1991-2020 period, the dashed lines represent the earlier 1961-1990 period, and the dotted lines represent the whole 1961-2020 period.

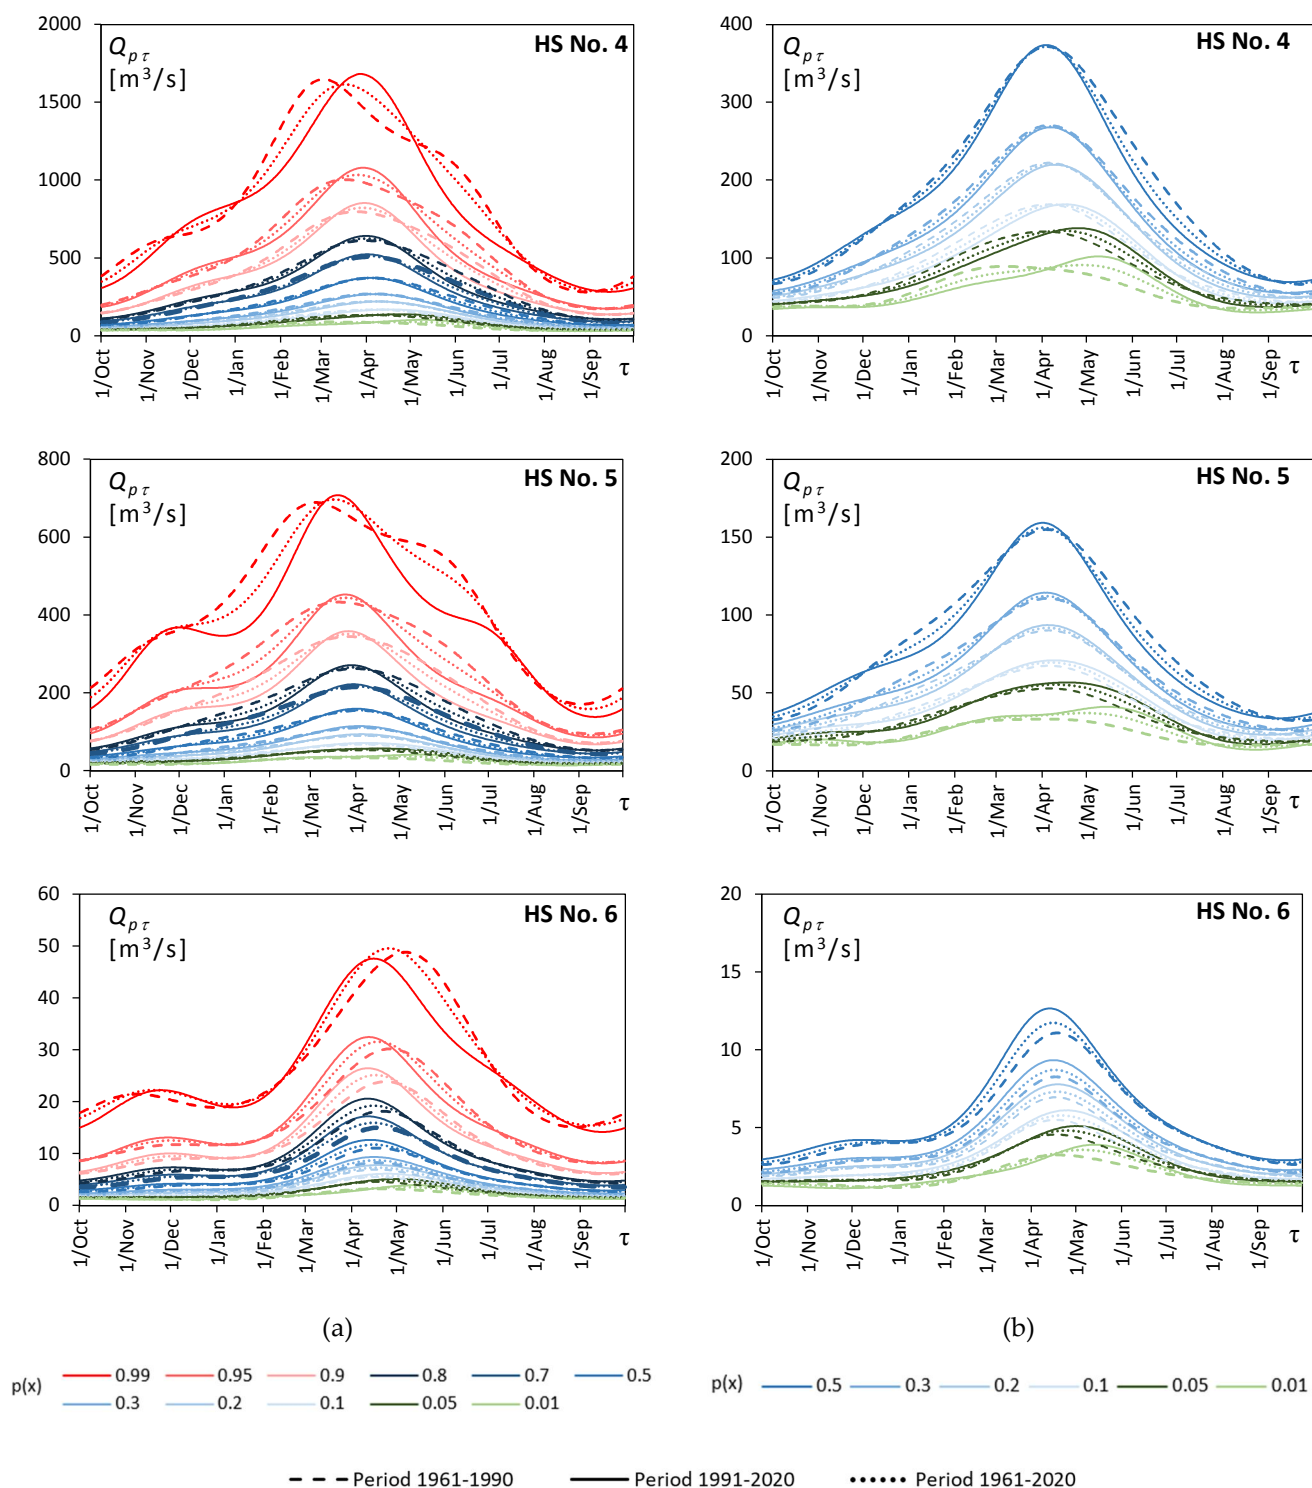

**Figure S4- cont'd.** The diagrams of MDDF at all HS for the three periods showing the quantiles (a) for a full range of probabilities  $p(x)$ , from 0.01 to 0.99, and (b) for low to median probabilities. Solid lines represent the latest 1991-2020 period, the dashed lines represent the earlier 1961-1990 period, and the dotted lines represent the whole 1961-2020 period.

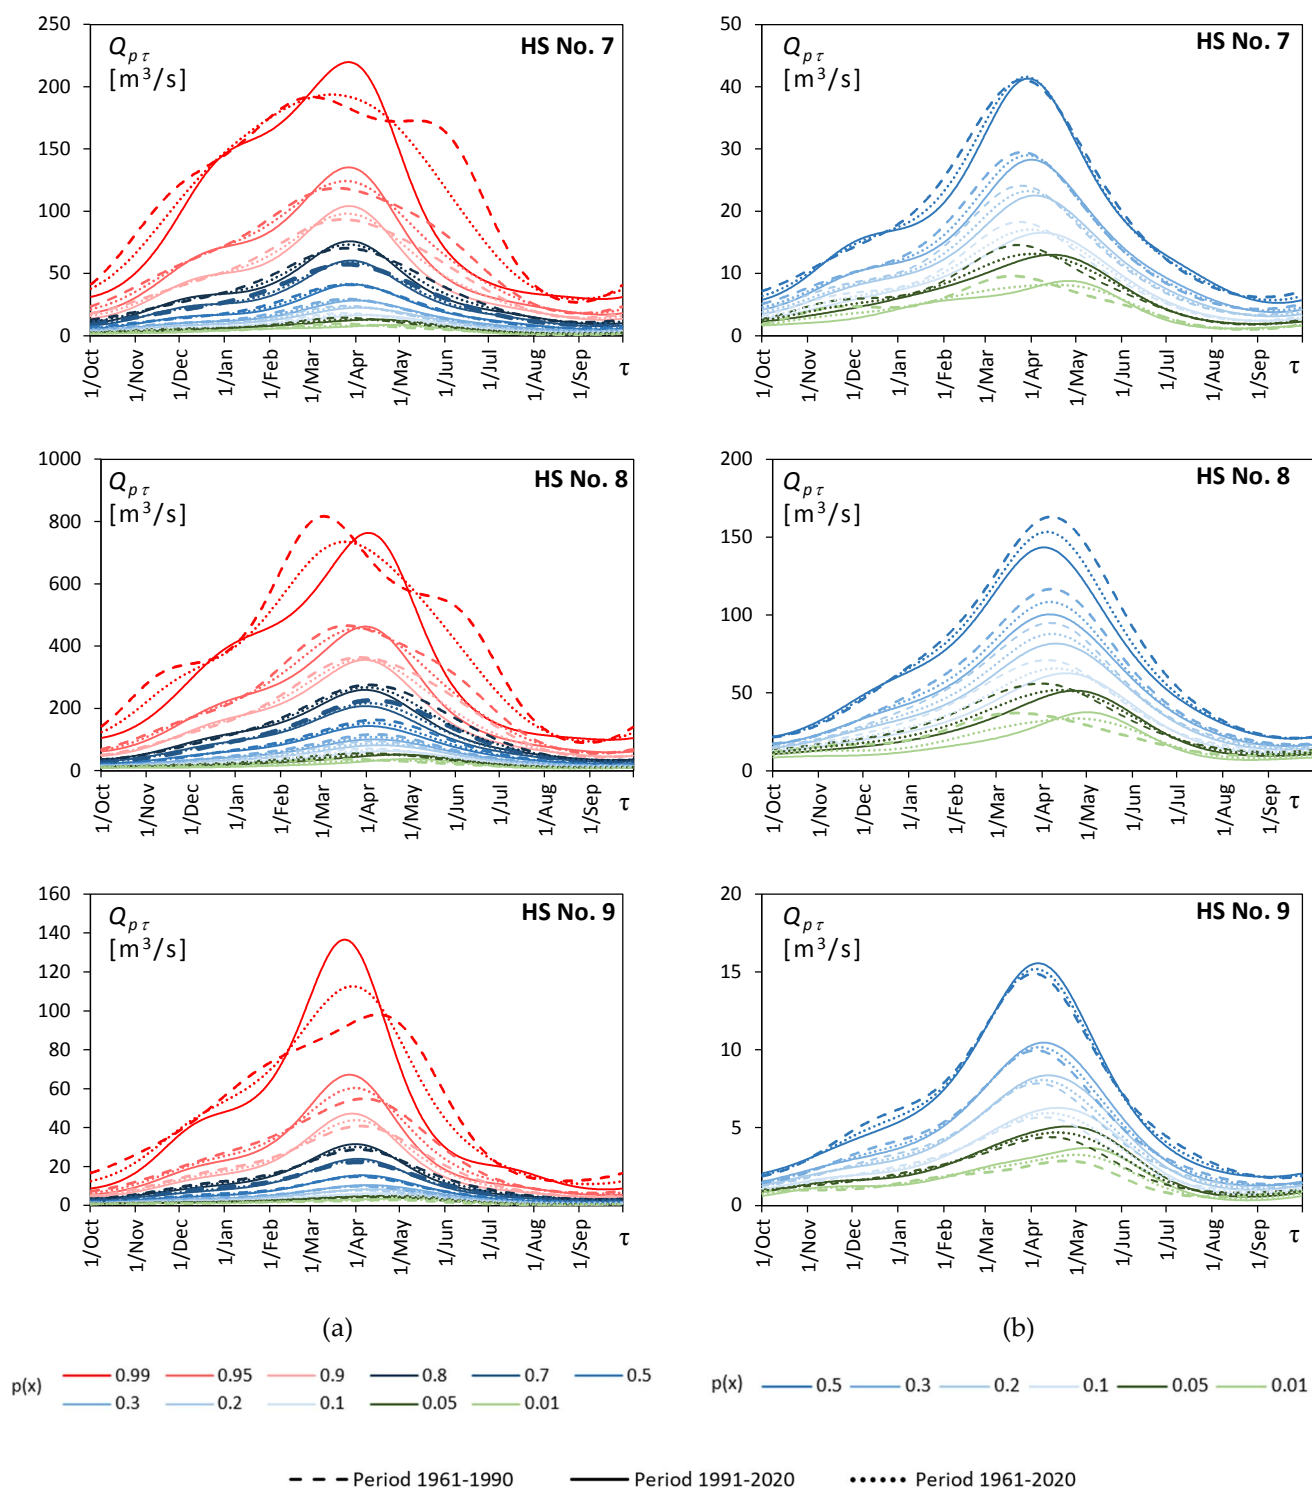

**Figure S4- cont'd.** The diagrams of MDDF at all HS for the three periods showing the quantiles (a) for a full range of probabilities  $p(x)$ , from 0.01 to 0.99, and (b) for low to median probabilities. Solid lines represent the latest 1991-2020 period, the dashed lines represent the earlier 1961-1990 period, and the dotted lines represent the whole 1961-2020 period.

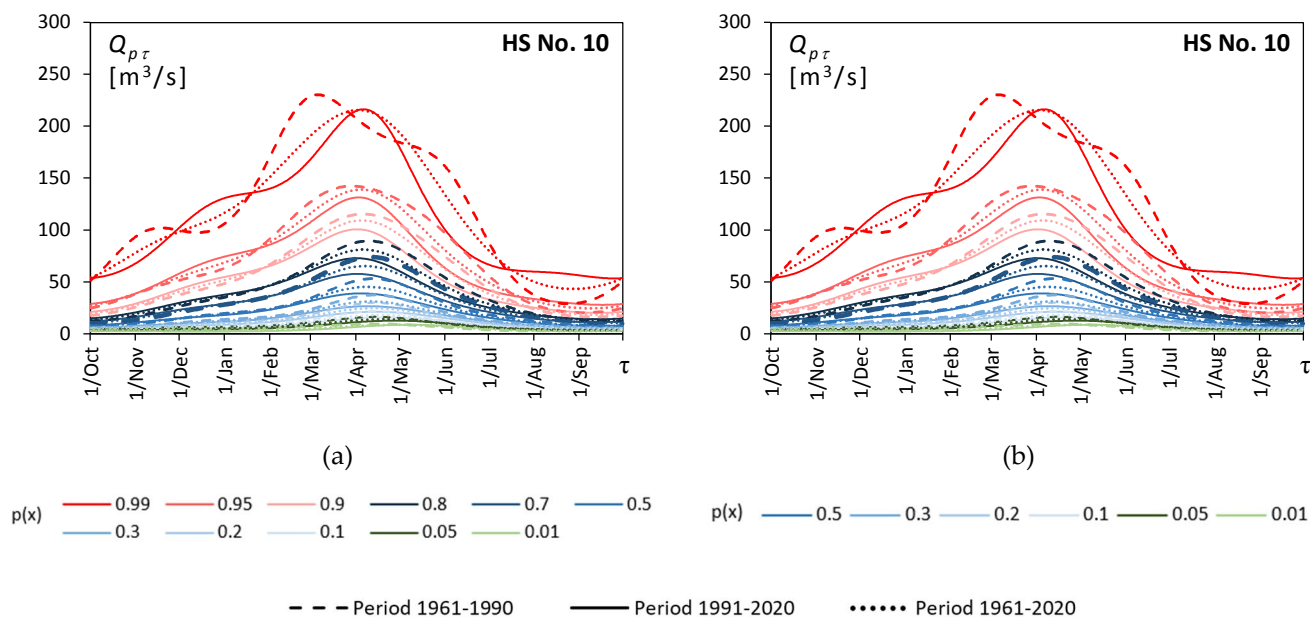

**Figure S4- cont'd.** The diagrams of MDDF at all HS for the three periods showing the quantiles (a) for a full range of probabilities  $p(x)$ , from 0.01 to 0.99, and (b) for low to median probabilities. Solid lines represent the latest 1991-2020 period, the dashed lines represent the earlier 1961-1990 period, and the dotted lines represent the whole 1961-2020 period.
